1 **STARRPeaker: Uniform processing and accurate identification of STARR-seq active**  
2 **regions**

3

4 Donghoon Lee<sup>1</sup>, Manman Shi<sup>2</sup>, Jennifer Moran<sup>2</sup>, Martha Wall<sup>2</sup>, Jing Zhang<sup>1,3</sup>, Jason Liu<sup>3</sup>,  
5 Dominic Fitzgerald<sup>2</sup>, Yasuhiro Kyono<sup>2</sup>, Lijia Ma<sup>2,4</sup>, Kevin P White<sup>2,5\*</sup>, Mark Gerstein<sup>1,3,6,7\*</sup>

6

7 1 Program in Computational Biology and Bioinformatics, Yale University, New Haven, CT  
8 06520, USA

9 2 Institute for Genomics and System Biology, University of Chicago, Chicago, IL, 60637, USA

10 3 Department of Molecular Biophysics and Biochemistry, Yale University, New Haven, CT  
11 06520, USA

12 4 School of Life Sciences, Westlake University, Hangzhou, 310024, China

13 5 Tempus Labs, Inc. Chicago IL 60654, USA

14 6 Department of Computer Science, Yale University, New Haven, CT 06520, USA

15 7 Department of Statistics and Data Science, Yale University, New Haven, CT 06520, USA

16

17 \* Corresponding author

18 E-mail: [pi@gersteinlab.org](mailto:pi@gersteinlab.org)

19

20

21 **Abstract**

22 High-throughput reporter assays, such as self-transcribing active regulatory region sequencing  
23 (STARR-seq), allow for unbiased and quantitative assessment of enhancers at a genome-wide  
24 level. Recent advances in STARR-seq technology have employed progressively more complex  
25 genomic libraries and increased sequencing depths, to assay larger sized regions, up to the entire  
26 human genome. These advances necessitate a reliable processing pipeline and peak-calling  
27 algorithm. Most STARR-seq studies have relied on chromatin immunoprecipitation sequencing  
28 (ChIP-seq) processing pipeline to identify peaks. However, there are key differences in STARR-  
29 seq versus ChIP-seq data: STARR-seq uses transcribed RNA to measure enhancer activity,  
30 making determining the basal transcription rate important. Furthermore, STARR-seq coverage is  
31 non-uniform, overdispersed, and often confounded by sequencing biases such as GC content and  
32 mappability. Moreover, here, we observed a clear correlation between RNA thermodynamic  
33 stability and STARR-seq readout, suggesting that STARR-seq might be sensitive to RNA  
34 secondary structure and stability. Considering these findings, we developed STARRPeaker: a  
35 negative binomial regression framework for uniformly processing STARR-seq data. We applied  
36 STARRPeaker to two whole human genome STARR-seq experiments; HepG2 and K562. Our  
37 method identifies highly reproducible and epigenetically active enhancers across replicates.  
38 Moreover, STARRPeaker outperforms other peak callers in terms of identifying known  
39 enhancers. Thus, our framework optimized for processing STARR-seq data accurately  
40 characterizes cell-type-specific enhancers, while addressing potential confounders.

41

42 **Keywords:** STARR-seq, peak caller, enhancer, non-coding

43

## 44 **Introduction**

45 The transcription of eukaryotic genes is precisely coordinated by an interplay between cis-  
46 regulatory elements. For example, enhancers and promoters serve as platforms for transcription  
47 factors (TF) to bind and interact with each other, and their interactions are often required to  
48 initiate transcription<sup>1,2</sup>. Enhancers, which are often located distantly from the transcribed gene  
49 body itself, play critical roles in the upregulation of gene transcription. Enhancers are cell-type  
50 specific and can be epigenetically activated or silenced to modulate transcriptional dynamics  
51 over the course of development. Enhancers can be found upstream or downstream of genes, or  
52 even within introns<sup>3-5</sup>. They function independent from their orientation, do not necessarily  
53 regulate the closest genes, and sometimes regulate multiple genes at once<sup>6,7</sup>. In addition, several  
54 recent studies have demonstrated that some promoters – termed E-promoters – may act as  
55 enhancers of distal genes<sup>8,9</sup>.

56  
57 Unlike protein-coding genes, enhancers do not yet have a well-characterized consensus sequence.  
58 Therefore, identifying enhancers in an unbiased fashion is challenging. The non-coding territory  
59 occupies over 98% of the genome landscape, making the search space very broad. Moreover, the  
60 activity of enhancers depends on the physiological condition and epigenetic landscape of the  
61 cellular environment, complicating the fair assessment of enhancer function.

62  
63 Previously, putative regulatory elements were computationally predicted, indirectly, by profiling  
64 DNA accessibility (using DNase-seq, FAIRE-seq, and ATAC-seq) as well as histone  
65 modifications (ChIP-seq) that are linked to regulatory functions<sup>10-12</sup>. More recently, researchers  
66 have developed high-throughput episomal (exogenous) reporter assays to directly measure

67 enhancer activity across the whole genome, specifically massively parallel reporter assays  
68 (MPRA)<sup>13,14</sup> and self-transcribing active regulatory region sequencing (STARR-seq)<sup>15,16</sup>. These  
69 assays allow for quantitative assessment of enhancer activity in a high-throughput fashion.

70

71 In STARR-seq, candidate DNA fragments are cloned downstream of a reporter gene into the 3'  
72 untranslated region (UTR). After transfecting the plasmid pool into host cells, one can measure  
73 the regulatory potential by high-throughput sequencing of the 3' UTR of the expressed reporter  
74 gene mRNA. These exogenous reporters enable accurate and unbiased assessment of enhancer  
75 activity at the whole genome level, independent of chromatin context. Unlike MPRA – which  
76 utilizes barcodes – STARR-seq produces self-transcribed RNA fragments that can be directly  
77 mapped onto the genome. The activities of enhancers are measured by comparing the amount of  
78 RNA produced from the input DNA library. STARR-seq has several technical advantages over  
79 MPRA. Library construction is relatively simple because barcodes are not needed. In addition,  
80 candidate enhancers are cloned instead of synthesized, allowing the assay to test extended  
81 sequence contexts (>500 bp) for enhancer activity, which studies have shown to be critical for  
82 functional activity<sup>17</sup>. Importantly, STARR-seq can be scaled to the whole genome level for  
83 unbiased scanning for functional elements. However, scaling STARR-seq to the human genome  
84 is still very challenging, primarily due to its massive size. A more complex genomic DNA  
85 library, a higher sequencing depth, and increased transfection efficiency are required to cover the  
86 whole human genome<sup>16</sup>, which could ultimately introduce biases.

87

88 Processing of STARR-seq is somewhat similar to chromatin immunoprecipitation sequencing  
89 (ChIP-seq), where protein-crosslinked DNA is immunoprecipitated and sequenced. A typical

90 ChIP-seq processing pipeline identifies genomic regions over-represented by sequencing tags in  
91 a ChIP sample compared to a control sample. STARR-seq data is compatible with most ChIP-  
92 seq peak callers. Hence, previous studies on STARR-seq have largely relied on peak calling  
93 software developed for ChIP-seq such as MACS2<sup>16,18,19</sup>. However, one must be cautious using  
94 ChIP-seq peak callers, at least without re-tuning default parameters optimized for processing  
95 transcription factor ChIP-seq<sup>20</sup>.

96

97 In this paper, we describe key differences in the processing of STARR-seq versus ChIP-seq data.  
98 Due to increased complexity of the genomic screening library and sequencing depth  
99 requirements, STARR-seq coverage is highly non-uniform. This leads to a lower signal-to-noise  
100 ratio than a typical ChIP-seq experiment and makes estimating the background model more  
101 challenging, which could ultimately lead to false positives peaks. In addition, STARR-seq  
102 measures more of a continuous activity similar to quantification in RNA-seq than a discrete  
103 binding event. Therefore, STARR-seq peaks should be further evaluated using a notion of  
104 activity score. These differences necessitate a unique approach to processing STARR-seq data.

105

106 We propose an algorithm optimized for processing and identifying functionally active enhancers  
107 from STARR-seq data, which we call STARRPeaker. This approach statistically models the  
108 basal level of transcription, accounting for potential confounding factors, and accurately  
109 identifies reproducible enhancers. We applied our method to two whole human STARR-seq  
110 datasets and evaluated its performance against previous methods. We also compared an R  
111 package, BasicSTARRseq, developed to process peaks from the first STARR-seq data<sup>15</sup>, which  
112 models enrichment using a binomial distribution. We benchmarked our peak calls against known

113 human enhancers. Thus, our findings support that STARRPeaker will be a useful tool for  
114 uniformly processing STARR-seq data.

115

## 116 **Materials and Methods**

117

### 118 *Precise measurement of STARR-seq coverage*

119 We binned the genome using a sliding window of length,  $l$ , and step size,  $s$ . Based on the average  
120 size of the STARR-seq library, we defined a 500 bp window length with a 100 bp step size to be  
121 the default parameter. Based on generated genomic bins, we calculated the coverage of both  
122 STARR-seq input and output mapped to each bin. For calculating the sequence coverage, other  
123 peak callers and many visualization tools commonly use the start position of the read<sup>15,21,22</sup>.  
124 However, given that the average sizes of the fragments inserted in STARR-seq libraries were  
125 approximately 500 bp, we expected that the read coverage using the start position of read may  
126 shift the estimate of the summit of signal and dilute the enrichment. Some peak callers have used  
127 read densities of forward and reverse strand separately to overcome this issue<sup>23,24</sup>. To precisely  
128 measure the coverage of STARR-seq input and output, we first inferred the size of the fragment  
129 insert from paired-end reads and used the center of the fragment insert, instead of start position  
130 of the read, to calculate coverage. For inferring the size of fragment insert, we first strictly  
131 filtered out reads that were not properly paired and chimeric. Chimeric alignments are reads that  
132 cannot be linearly aligned to a reference genome, implying a potential discrepancy between the  
133 sequenced genome and the reference genome and indicative of structural variation<sup>25</sup>. We also  
134 filtered out read pairs that had a fragment insert size less than  $l_{max}$  and greater than  $l_{min}$ . By  
135 default, we filtered out fragment insert sizes less than 100 bp and greater than 1,000 bp. After

136 filtering out spurious read-pairs, we estimated the center of the fragment insert and counted the  
137 fragment depth for each genomic bin. We compared the coverage calculated using the start of  
138 read against the center of fragment insert and observed both a shift in the location of enrichment  
139 summit and a difference in enrichment level (**Figure 1**).

140

#### 141 *Controlling for potential systemic bias in sequencing and STARR-seq library preparation*

142 STARR-seq measures the ratio of transcribed RNA to DNA for a given test region and  
143 determines whether the test region can facilitate transcription at a higher rate than the basal level.  
144 This is based on the assumption that the basal transcriptional level stays relatively constant  
145 across the genome and the transcriptional rate is a reflection of the regulatory activity of a test  
146 region. However, this may not always be true, and one needs to consider potential systemic  
147 biases when analyzing the result. Unlike ChIP-seq where both the experiment and input controls  
148 are from the same DNA origin, STARR-seq experiments measure the regulatory potential from  
149 the abundance of transcribed RNA, which adds a layer of complexity. For example, RNA  
150 structure and co-transcriptional folding might potentially influence the readout of STARR-seq  
151 experiments<sup>26</sup>. Single-stranded RNA starts to fold upon transcription and the resulting RNA  
152 structure might influence the measurement of regulatory activity. Previously, researchers  
153 suggested a potential linkage between RNA secondary structure and transcriptional regulation<sup>27</sup>.  
154 In addition, the resulting transcribed RNA undergoes a series of post-transcriptional regulation,  
155 and RNA stability might play a critical role. Moreover, previous reports have shown that the  
156 degradation rates vary significantly across the genome and RNA degradation rates are the main  
157 determinant of cellular RNA levels<sup>28</sup>. Furthermore, RNA stability correlates with  
158 functionality<sup>29,30</sup>.

159

160 There are also intrinsic sequencing biases in library preparation. A genome-wide reporter library  
161 is made from randomly sheared genomic DNA, but DNA fragmentation is often non-random<sup>31</sup>.  
162 Studies have also suggested that epigenetic mechanisms and CpG methylation may influence  
163 fragmentation<sup>32</sup>. Furthermore, the isolated polyadenylated RNAs are reverse transcribed and  
164 PCR is amplified before sequenced, and this process can further confound the sequenced  
165 candidate fragments.

166

167 To unbiasedly test for the regulatory activity, a model needs to control for these potential  
168 systemic biases inherent to generating STARR-seq data. As we expected, we observed that  
169 STARR-seq coverage for both input and output are confounded by potential sequencing bias  
170 (**Figure 2**). Notably, STARR-seq coverage significantly correlated with GC content (PCC 0.61;  
171 P-val 1E-299), mappability (PCC 0.45; P-val 2.9E-148), and RNA thermodynamic stability  
172 (PCC -0.55; P-val 0). Hence, to unbiasedly identify the activity peaks from STARR-seq, we  
173 developed a model that accounts for variability of tested candidate fragments.

174

### 175 *Accurate modelling of STARR-seq coverage using negative binomial regression*

176 To model the fragment coverage data from STARR-seq using discrete probability distribution,  
177 we assumed that each genomic bin is independent and identically distributed, as specified in  
178 Bernoulli trials<sup>33</sup>. That is, each test fragment can only map to a single fixed-length bin. Therefore,  
179 we only considered a non-overlapping subset of bins for modeling and fitting the distribution.  
180 We also excluded bins not covered by any genomic input or normalized input coverage was less  
181 than a minimum quantile  $t_{min}$ , since these regions do not have sufficient power to detect



182 enrichment. We simulated and fitted various discrete probability distributions to STARR-seq  
183 coverage. We observed that the STARR-seq coverage data was overdispersed and fitted the best  
184 with negative binomial distribution (**Figure 3A**). We also noticed a slight negative enrichment,  
185 indicating that some candidate fragments can silence the basal transcriptional activity. A Q-Q  
186 plot of simulated coverage further demonstrated that the negative binomial model provides the  
187 best fit for the data (**Figure 3B**).

188

### 189 *Peak caller*

190 To accurately model the ratio of STARR-seq sequence coverage (RNA) to input sequence  
191 coverage (DNA) while controlling for potential confounding factors, we applied a negative  
192 binomial regression. The overview of our model is outlined in **Figure 4**. Our model starts by  
193 fitting an analytical distribution to the observed fragment coverage across each genomic bin. In  
194 doing so, we use covariates to model expected counts in the form of multiple regression. Once  
195 regression coefficients are estimated from a set of data, we can evaluate the likelihood of  
196 observing the fragment count for each bin and assign p-values. Ultimately, bins with significant  
197 enrichments are selected based on an adjusted p-values threshold, and they are fine-tuned to the  
198 summit of the peak fragment enrichment.

199

200 Let  $Y$  be a vector of STARR-seq output (RNA) coverage, then  $y_i$  for  $1 \leq i \leq n$  denotes the  
201 number of RNA fragments from STARR-seq experiment mapped to the  $i$ -th bin from the total of  
202  $n$  genomic bins. Let  $t_i$  be the number of input library (DNA) mapped to the  $i$ -th bin. We define  
203  $X$  be the matrix of covariates where  $\vec{x}_i$  is the vector of covariates corresponding to the  $i$ -th bin,  
204 and  $x_{ij}$  is the  $j$ -th covariate for the  $i$ -th bin.

205

206 Negative binomial distribution

207 A negative binomial distribution, which arises from a Gamma-Poisson mixture, can be  
208 parametrized as follows<sup>34-36</sup> (see Supplementary Methods for derivation).

209

$$f_Y(y_i|\mu_i, \theta) = \frac{\Gamma(y_i + \theta)}{\Gamma(y_i + 1) \cdot \Gamma(\theta)} \cdot \left(\frac{\theta}{\theta + \mu_i}\right)^\theta \cdot \left(\frac{\mu_i}{\theta + \mu_i}\right)^{y_i}$$

210

211 A negative binomial is a generalization of a Poisson regression that allows the variance to be  
212 different from the mean, shaped by the dispersion parameter  $\theta$ . The variance for the NB2 model  
213 is given as

214

$$\sigma^2 = \mu + \frac{\mu^2}{\theta}$$

215

216 We assume that the majority of genomic bins will have a basal level of transcription, and the  
217 count of RNA fragments at each  $i$ -th bin follows the traditional negative binomial (NB2)  
218 distribution. The expected fragment counts,  $E(y_i)$ , represents the mean incidence,  $\mu_i$ .

219

$$y_i \sim NB(\mu_i, \theta)$$

$$E(y_i) = \mu_i$$

220

221 Negative binomial regression model

222 The regression term for the expected RNA fragment count can be expressed in terms of a linear  
223 combination of explanatory variables, a set of  $m$  covariates ( $\vec{x}$ ). We use the input library variable  
224  $t_i$  as one covariate. For simplicity, we denote  $t_i$  as  $x_{0i}$  hereafter.

225

$$\begin{aligned}\ln \mu_i &= \beta_0 x_{0i} + \beta_1 x_{1i} + \dots + \beta_m x_{mi} \\ \mu_i &= \exp(\beta_0 x_{0i} + \beta_1 x_{1i} + \dots + \beta_m x_{mi}) \\ \mu_i &= \exp(\vec{x}_i^T \beta)\end{aligned}$$

226

227 Alternatively, instead of using the input library variable  $t_i$  as one covariate, we can directly use it  
228 as an offset variable. One advantage of using the input variable as an “exposure” to the RNA  
229 output coverage is that it allows us to directly model the basal transcription rate (the ratio of  
230 RNA to DNA) as a rate response variable. More details on this alternative parametrization are  
231 described in the Supplementary Methods.

232

### 233 Maximum-likelihood estimation

234 We fit the model and estimate regression coefficients using the maximum likelihood method,  
235 where log-likelihood function is shown as follows.

236

$$\mathcal{L}_{NB}(\mu|y, \theta) = \sum_{i=1}^n y_i \ln\left(\frac{\mu_i}{\theta + \mu_i}\right) + \theta \ln\left(\frac{\theta}{\theta + \mu_i}\right) + \ln\left(\frac{\Gamma(y_i + \theta)}{\Gamma(y_i + 1) \cdot \Gamma(\theta)}\right)$$

237

238 Substituting  $\mu_i$  with the regression term, the log-likelihood function can be parametrized in terms  
239 of regression coefficients,  $\beta$ .

240

$$\mathcal{L}_{NB}(\beta|y, \theta) = \sum_{i=1}^n y_i \ln\left(\frac{e^{\bar{x}_i \beta}}{\theta + e^{\bar{x}_i \beta}}\right) + \theta \ln\left(\frac{\theta}{\theta + e^{\bar{x}_i \beta}}\right) + \ln\left(\frac{\Gamma(y_i + \theta)}{\Gamma(y_i + 1) \cdot \Gamma(\theta)}\right)$$

241

242 We can determine the maximum likelihood estimates of the model parameters by setting the first  
243 derivative of the log-likelihood with respect to  $\beta$ , the gradient, to zero, and there is no analytical  
244 solution for  $\hat{\beta}$ . Numerically, we iteratively solve for the regression coefficients  $\beta$  and the  
245 dispersion parameter  $\theta$ , alternatively, until both parameters converge.

246

#### 247 Estimation of P-value

248 Finally, we calculate a P-value based on the fitted value of the  $i$ -th bin from the cumulative  
249 distribution function of negative binomial distribution, and we assign false discovery rate using  
250 Benjamini & Hochberg method<sup>37</sup>.

251

$$\begin{aligned} P\text{-value} &= \Pr(x \geq y_i) = 1 - CDF(x = y_i - 1) \\ &= 1 - \sum_{i=0}^{\hat{y}_i - 1} \binom{\hat{y}_i + \theta - 1}{\hat{y}_i} \frac{\theta}{\theta + \hat{y}_i} \left(1 - \frac{\theta}{\theta + \hat{y}_i}\right)^\theta \end{aligned}$$

252

#### 253 **Source code and data availability**

254 We implemented the method described in this article as a Python software package called  
255 STARRPeaker. The software package can be downloaded, installed, and readily used to call  
256 peaks from any STARR-seq dataset. The STARRPeaker package, as well as source code and

257 documentation, is freely available at: <http://github.com/gersteinlab/starrpeaker>. Data used in the  
258 analysis will be made available from the Gene Expression Omnibus for public use.  
259 DNase-seq and ChIP-seq data used for the analysis is publicly available from the ENCODE  
260 portal (<https://www.encodeproject.org/>). The specific accession codes used for the analysis are  
261 listed in Supplementary Table S3. GC content was downloaded from the UCSC Genome  
262 Browser (<http://hgdownload.cse.ucsc.edu/gbdb/hg38/bbi/gc5BaseBw/>), and the mappability  
263 track was created using gem-library software<sup>38</sup> with a k-mer size of 100 bp and the reference  
264 human genome build hg38.

265

## 266 **Results**

267 We applied our peak calling algorithm to two whole human genome STARR-seq experiments,  
268 K562 and HepG2, utilizing origin of replication-based (ORI) plasmids. Using this dataset, we  
269 evaluated the quality and characteristics of identified enhancers as well as the performance of the  
270 peak caller by comparing to external enhancer datasets.

271

### 272 ***Accurate identification of highly reproducible enhancers***

273 To evaluate the quality of enhancers identified from STARRPeaker, we uniformly called peaks  
274 from the whole human genome STARR-seq dataset using methods previously used to identify  
275 enhancers from STARR-seq data, namely BasicSTARRseq and MACS2, using recommended  
276 settings. We first compared the level of epigenetic profile enrichment around the peaks. We  
277 observed higher enrichment of DNase hypersensitive sites, as well as more distinct double-peak  
278 patterns of H3K27ac and H3K4me1, using STARR-seq versus BasicSTARRseq or MACS2  
279 (**Figure 5**). We also aggregated the transcription factor binding sites assayed by ChIP-seq around

280 peaks, and we observed significant enrichment of transcription factor binding events compared  
281 to peaks identified by other methods. Furthermore, we compared STARRPeaker peaks and  
282 others to previously characterized enhancers by CAGE<sup>39</sup>, MPRA<sup>17,40</sup>, and STARR-seq<sup>19</sup> in  
283 HepG2 or K562 cell line (**Figure 6**). We observed a higher fraction of STARRPeaker peaks  
284 overlap with external datasets.

285

## 286 **Discussion**

287 We developed a statistically rigorous analysis pipeline for STARR-seq data in a software  
288 package named STARRPeaker. STARRPeaker has several key improvements over previous  
289 peak identification methods including (1) accurate quantification of STARR-seq coverage based  
290 on inferred fragment size from paired-end reads; (2) use of a negative binomial distribution to  
291 account for overdispersion in bin counts; and (3) modeling of STARR-seq coverage as a function  
292 of input and potential confounding variables in STARR-seq signal. We applied our method to  
293 two whole human genome ORI-STARR-seq datasets and demonstrated that it can unbiasedly  
294 identify a set of STARR-seq-positive regions better than previous methods. The STARR-seq  
295 peaks were enriched with epigenetic marks relevant to enhancers and overlapped better with  
296 previously known enhancers than previous methods.

297

298 To completely understand how noncoding regulatory elements can modulate transcriptional  
299 programs in human, STARR-seq active regions must be further characterized and validated  
300 within the cellular context. Currently, CRISPR-based screens are limited to a small number of  
301 selected targets. Our method can aid in prioritize candidate regions in unbiased fashion to  
302 maximize the functional characterization efforts.

303

304 **Funding**

305 We acknowledge support from the NIH and from the AL Williams Professorship funds.

306

307 **Acknowledgements**

308 We thank Jinrui Xu and Joel Rozowsky for thoughtful discussion about CHIP-seq processing,

309 Michael Rutenberg Schoenberg and Zhen Chen for thoughtful discussion about RNA folding

310 biology, and all other members of the Gerstein and White laboratories for advice and critical

311 feedback on the manuscript.

312

313 **Author Contributions**

314 D.L., M.S., K.W., and M.G. conceived the project. D.L. and M.G. drafted the manuscript. D.L.

315 developed the STARRPeaker software package. M.S., J.M., M.W., D.F., Y.K., and L.M.

316 performed experimental work. M.W. performed experimental validation. D.L., J.Z., and J.L.

317 performed the downstream analysis. M.G. and K.W. provided funding and supervised the project.

318

319

320 **References**

- 321 1. Muerdter, F., Boryń, Ł. M. & Arnold, C. D. STARR-seq — Principles and applications.  
322 *Genomics* **106**, 145–150 (2015).
- 323 2. Yáñez-Cuna, J. O., Kvon, E. Z. & Stark, A. Deciphering the transcriptional cis-regulatory  
324 code. *Trends Genet.* **29**, 11–22 (2013).
- 325 3. Lettice, L. A. *et al.* A long-range Shh enhancer regulates expression in the developing  
326 limb and fin and is associated with preaxial polydactyly. *Hum. Mol. Genet.* **12**, 1725–1735  
327 (2003).
- 328 4. Banerji, J., Rusconi, S. & Schaffner, W. Expression of a beta-globin gene is enhanced by  
329 remote SV40 DNA sequences. *Cell* **27**, 299–308 (1981).
- 330 5. Sagai, T., Hosoya, M., Mizushina, Y., Tamura, M. & Shiroishi, T. Elimination of a long-  
331 range cis-regulatory module causes complete loss of limb-specific Shh expression and  
332 truncation of the mouse limb. *Development* **132**, 797–803 (2005).
- 333 6. Melo, C. A. *et al.* eRNAs Are Required for p53-Dependent Enhancer Activity and Gene  
334 Transcription. *Mol. Cell* **49**, 524–535 (2013).
- 335 7. Sanyal, A., Lajoie, B. R., Jain, G. & Dekker, J. The long-range interaction landscape of  
336 gene promoters. *Nature* **489**, 109–13 (2012).
- 337 8. Dao, L. T. M. *et al.* Genome-wide characterization of mammalian promoters with distal  
338 enhancer functions. *Nat. Genet.* **49**, 1073–1081 (2017).
- 339 9. Diao, Y. *et al.* A tiling-deletion-based genetic screen for cis-regulatory element  
340 identification in mammalian cells. *Nat. Methods* **14**, 629–635 (2017).
- 341 10. Ernst, J. & Kellis, M. ChromHMM: automating chromatin-state discovery and  
342 characterization. *Nat. Methods* **9**, 215–216 (2012).



- 343 11. Hoffman, M. M. *et al.* Unsupervised pattern discovery in human chromatin structure  
344 through genomic segmentation. *Nat. Methods* **9**, 473–476 (2012).
- 345 12. Sethi, A. *et al.* A cross-organism framework for supervised enhancer prediction with  
346 epigenetic pattern recognition and targeted validation. *bioRxiv* 385237 (2018).  
347 doi:10.1101/385237
- 348 13. Patwardhan, R. P. *et al.* Massively parallel functional dissection of mammalian enhancers  
349 in vivo. *Nat. Biotechnol.* **30**, 265–270 (2012).
- 350 14. Melnikov, A. *et al.* Systematic dissection and optimization of inducible enhancers in  
351 human cells using a massively parallel reporter assay. *Nat. Biotechnol.* **30**, 271–277  
352 (2012).
- 353 15. Arnold, C. D. *et al.* Genome-wide quantitative enhancer activity maps identified by  
354 STARR-seq. *Science* **339**, 1074–7 (2013).
- 355 16. Liu, Y. *et al.* Functional assessment of human enhancer activities using whole-genome  
356 STARR-sequencing. *Genome Biol.* **18**, 219 (2017).
- 357 17. Klein, J. C. *et al.* A systematic evaluation of the design, orientation, and sequence context  
358 dependencies of massively parallel reporter assays. *bioRxiv* 576405 (2019).  
359 doi:10.1101/576405
- 360 18. Johnson, G. D. *et al.* Human genome-wide measurement of drug-responsive regulatory  
361 activity. *Nat. Commun.* **9**, 5317 (2018).
- 362 19. Rathert, P. *et al.* Transcriptional plasticity promotes primary and acquired resistance to  
363 BET inhibition. *Nature* **525**, 543–547 (2015).
- 364 20. Koohy, H., Down, T. A., Spivakov, M. & Hubbard, T. A comparison of peak callers used  
365 for DNase-Seq data. *PLoS One* **9**, e96303 (2014).

- 366 21. Uren, P. J. *et al.* Site identification in high-throughput RNA-protein interaction data.  
367 *Bioinformatics* **28**, 3013–20 (2012).
- 368 22. Strbenac, D., Armstrong, N. J. & Yang, J. Y. H. Detection and classification of peaks in 5'  
369 cap RNA sequencing data. *BMC Genomics* **14 Suppl 5**, S9 (2013).
- 370 23. Zhang, Y. *et al.* Model-based Analysis of ChIP-Seq (MACS). *Genome Biol.* **9**, R137  
371 (2008).
- 372 24. Kharchenko, P. V, Tolstorukov, M. Y. & Park, P. J. Design and analysis of ChIP-seq  
373 experiments for DNA-binding proteins. *Nat. Biotechnol.* **26**, 1351–1359 (2008).
- 374 25. Li, H. *et al.* The Sequence Alignment/Map format and SAMtools. *Bioinformatics* **25**,  
375 2078–2079 (2009).
- 376 26. Lai, D., Proctor, J. R. & Meyer, I. M. On the importance of cotranscriptional RNA  
377 structure formation. *RNA* **19**, 1461–1473 (2013).
- 378 27. Ringnér, M. & Krogh, M. Folding free energies of 5'-UTRs impact post-transcriptional  
379 regulation on a genomic scale in yeast. *PLoS Comput. Biol.* **1**, e72 (2005).
- 380 28. Rabani, M. *et al.* Metabolic labeling of RNA uncovers principles of RNA production and  
381 degradation dynamics in mammalian cells. *Nat. Biotechnol.* **29**, 436–42 (2011).
- 382 29. Yang, E. *et al.* Decay rates of human mRNAs: correlation with functional characteristics  
383 and sequence attributes. *Genome Res.* **13**, 1863–72 (2003).
- 384 30. Tani, H. *et al.* Genome-wide determination of RNA stability reveals hundreds of short-  
385 lived noncoding transcripts in mammals. *Genome Res.* **22**, 947–56 (2012).
- 386 31. Poptsova, M. S. *et al.* Non-random DNA fragmentation in next-generation sequencing. *Sci.*  
387 *Rep.* **4**, 4532 (2014).
- 388 32. Lazarovici, A. *et al.* Probing DNA shape and methylation state on a genomic scale with

- 389 DNase I. *Proc. Natl. Acad. Sci. U. S. A.* **110**, 6376–81 (2013).
- 390 33. Papoulis, A. & Athanasios. Probability, random variables and stochastic processes. *New*  
391 *York McGraw-Hill, 1984, 2nd ed.* (1984).
- 392 34. Hilbe, J. M. *Negative Binomial Regression.* (Cambridge University Press, 2011).  
393 doi:10.1017/CBO9780511973420
- 394 35. Cameron, A. C. A. & Trivedi, P. K. *Regression Analysis of Count Data.* (Cambridge  
395 University Press, 2013). doi:10.1017/CBO9781139013567
- 396 36. Hilbe, J. M. *Modeling Count Data.* (Cambridge University Press, 2014).  
397 doi:10.1017/CBO9781139236065
- 398 37. Benjamini, Y. & Hochberg, Y. Controlling the False Discovery Rate: A Practical and  
399 Powerful Approach to Multiple Testing. *J. R. Stat. Soc. Ser. B* **57**, 289–300 (1995).
- 400 38. Derrien, T. *et al.* Fast Computation and Applications of Genome Mappability. *PLoS One* **7**,  
401 e30377 (2012).
- 402 39. Kawaji, H., Kasukawa, T., Forrest, A. & Carninci, P. The FANTOM 5 collection, a data  
403 series underpinning mammalian transcriptome atlases in diverse cell types. *Sci. Data*  
404 2016–2018 (2017). doi:10.1038/sdata.2017.113
- 405 40. Inoue, F. *et al.* A systematic comparison reveals substantial differences in chromosomal  
406 versus episomal encoding of enhancer activity. *Genome Res.* **27**, 38–52 (2017).  
407  
408

409 **Supplementary Methods**

410 *Cell culture*

411 We cultured K562 cells (ATCC) in IMDM (Gibco #12440) supplemented with 10% fetal bovine  
412 serum (FBS) and 1% pen/strep and maintained in a humidified chamber at 37°C with 5% CO<sub>2</sub>.

413 We cultured HepG2 cells (ATCC) in EMEM (ATCC #30-2003) supplemented with 10% FBS  
414 and 1% pen/strep, maintained in a humidified chamber at 37°C with 5% CO<sub>2</sub>.

415

416 *Generating an ORI-STARR-seq input plasmid library*

417 We sonicated human male genomic DNA (Promega #G1471) using a Covaris S220 sonicator  
418 (duty factor – 5%; cycle per burst – 200; 40 sec) and ran it on a 0.8% agarose gel to size-select  
419 500 bp fragments. After gel purification using a MinElute Gel Extraction kit (Qiagen), we end-  
420 repaired, ligated custom adaptors, and PCR-amplified DNA fragments using Q5 Hot Start High-  
421 Fidelity DNA polymerase (NEB) (98°C for 30 sec; 10 cycles of 98°C for 10 sec, 65°C for 30 sec,  
422 and 72°C for 30 sec; 72°C for 2 min) to add homology arms for Gibson assembly cloning.

423 We used AgeI-HF (NEB) and Sall-HF (NEB) to linearize the hSTARR-seq\_ORI plasmid (gift  
424 from Alexander Stark; Addgene plasmid #99296) and cloned the PCR products into the vector  
425 using Gibson Assembly Master Mix (NEB); we set up 60 replicate reactions to maintain  
426 complexity. We purified the assembly reactions using SPRI beads (Beckman Coulter), dialyzed  
427 them using Slide-A-Lyzer MINI dialysis devices (ThermoScientific), and concentrated them  
428 using an Amicon Ultra-0.5 device (Amicon). We transformed the reaction into MegaX  
429 DH10BTM T1 electrocompetent cells (Thermo Fisher Scientific) (with 25 replicate  
430 transformations to maintain complexity) and let them grow in 12.5L LB-Amp medium until they  
431 reached an optical density of ~1.0. We extracted the plasmids using a Plasmid Gigaprep Kit

432 (Qiagen) and dialyzed the plasmid prep using Slide-A-Lyzer MINI dialysis devices before  
433 electroporation.

434

435 *Electroporation-mediated transfection of ORI-STARR-seq input plasmid library into K562 and*  
436 *HepG2 cell lines*

437 We electroporated the ORI-STARR-seq library using an AgilePulse Max (Harvard Apparatus)  
438 and generated two biological replicate for each cell line. For K562 cells, we electroporated 5.6  
439 mg of input plasmid library into 700 million cells per biological replicate by delivering three 500  
440 V pulses (1 ms duration with a 20 ms interval). For HepG2 cells, we electroporated 8 mg of input  
441 plasmid library into one billion cells in one replicate, and 5.6 mg into 700 million cells in another  
442 replicate by delivering three 300 V pulses (5 ms duration with a 20 ms interval).

443

444 *Generation of an Illumina sequencing library*

445 *Output RNA library:* We harvested cells 24 hr after electroporation, and extracted total RNA  
446 using an RNeasy Maxi kit (Qiagen). We further isolated polyA-plus mRNA using Dynabeads®  
447 Oligo (dT) kit (ThermoFisher Scientific), treated it with TURBO DNase (Invitrogen), and  
448 purified the reaction using an RNeasy MinElute Kit (Qiagen). We synthesized cDNA using  
449 SuperScript III (ThermoFisher Scientific) with a custom primer that specifically recognizes  
450 mRNAs that had been transcribed from the ORI-STARR-seq library. After reverse transcription,  
451 we treated the reactions with a cocktail of RNase A and RNase T1 (ThermoFisher Scientific).  
452 We split cDNA samples into 160 replicate sub-reactions, and PCR-amplified each sub-reaction  
453 with a primer with a unique index (helping to identify PCR duplicates) using Q5 Hot Start High-  
454 Fidelity DNA polymerase (NEB) with the following program: 98°C for 30 s; cycles of 98°C for

455 10 s, 65°C for 30 s, 72°C for 30 s (until they reached mid-log amplification phase; we cycled 18  
456 cycles for K562 Rep.1; 16 cycles for K562 Rep. 2; 18 cycles for HepG2 Rep. 1; and 15 cycles  
457 for HepG2 Rep2); 72°C for 2 min). After PCR, we re-combined all sub-reactions into one and  
458 purified it with Agencourt Beads. We generated 100 bp paired-end reads for each biological  
459 replicate on an Illumina Hiseq4000 at the University of Chicago Genome Facility.

460 *Input DNA library:* We PCR-amplified a total of 200 ng of input plasmid library (in 16 replicate  
461 reactions) using Q5 Hot Start High-Fidelity DNA polymerase (NEB) with the following  
462 program: 98°C for 30 s; 4 cycles of 98°C for 10 s, 65°C for 30 s, and 72°C for 20 s; 8 cycles of  
463 98°C for 10 s and 72°C for 50 s; 72°C for 2 min). After PCR, we combined all products into one  
464 and purified it with Agencourt Beads. We generated 100 bp paired-end reads on an Illumina  
465 Hiseq4000 at the University of Chicago Genome Facility.

466

#### 467 *Sequencing and preprocessing*

468 For each of 160 replicates, paired-end sequencing reads were aligned to the human reference  
469 genome hg38 using BWA-mem (v0.7.17). Alignments were filtered against unmapped,  
470 secondary alignments, mapping quality score less than 30, and PCR duplicates using SAMtools  
471 (v1.5) and Picard (v2.9.0). All of replicates were pooled and sorted for downstream analysis.

472

#### 473 *Negative binomial distribution*

474 A negative binomial distribution, which arises from Gamma-Poisson mixture, can be  
475 parametrized for  $y \geq 0$  as follows.

476

$$Pr(Y = y_i | \mu_i, \theta) = f_Y(y_i; \mu_i, \theta) = \frac{\Gamma(y_i + \theta)}{\Gamma(y_i + 1) \cdot \Gamma(\theta)} \cdot \left(\frac{\theta}{\theta + \mu_i}\right)^\theta \cdot \left(\frac{\mu_i}{\theta + \mu_i}\right)^{y_i}$$

477

478 Rearranging gives:

479

$$f_Y(y_i; \mu_i, \theta) = \frac{\Gamma(y_i + \theta)}{\Gamma(y_i + 1) \cdot \Gamma(\theta)} \cdot \left( \frac{1}{1 + \frac{\mu_i}{\theta}} \right)^\theta \cdot \left( \frac{\frac{\mu_i}{\theta}}{1 + \frac{\mu_i}{\theta}} \right)^{y_i}$$

$$f_Y(y_i; \theta, \mu_i) = \frac{\Gamma(y_i + \theta)}{\Gamma(y_i + 1) \cdot \Gamma(\theta)} \cdot \left( \frac{\mu_i}{\theta} \right)^{y_i} \left( \frac{1}{1 + \frac{\mu_i}{\theta}} \right)^{\theta + y_i}$$

$$f_Y(y_i; \theta, \mu_i) = \frac{\Gamma(y_i + \theta)}{\Gamma(y_i + 1) \cdot \Gamma(\theta)} \cdot \left( \frac{\mu_i}{\theta} \right)^{y_i} \left( \frac{\theta}{\theta + \mu_i} \right)^{\theta + y_i}$$

$$f_Y(y_i; \theta, \mu_i) = \frac{\Gamma(y_i + \theta)}{\Gamma(y_i + 1) \cdot \Gamma(\theta)} \cdot \frac{\mu_i^{y_i} \theta^\theta}{(\theta + \mu_i)^{\theta + y_i}}$$

480

481 *Alternative parametrization of negative binomial regression using a rate model*

482 Alternative parametrization allows STARR-seq data to be modelled as a rate model. In contrast

483 to using input coverage as one of the covariates, we can consider it as “exposure” to output

484 coverage. This “trick” allows us to directly model the basal transcription rate (the ratio of RNA

485 to DNA) as a rate response variable. We defined the transcription rate (RNA to DNA ratio) as a

486 new variable,  $\pi_i$ .

487

$$\frac{y_i}{t_i} = \pi_i$$

488

489 If we assume the majority of genomic bins will have the basal transcription rate, we can model  
490 the transcription rate at each  $i$ -th bin following the traditional negative binomial (NB2)  
491 distribution.

492

$$\pi_i \sim NB\left(\frac{\mu_i}{t_i}, \theta\right)$$

493

494 The expected basal transcription,  $E(\pi_i)$ , becomes the mean incidence rate of  $y_i$  per unit of  
495 exposure,  $t_i$ .

496

$$E\left(\frac{y_i}{t_i}\right) = \frac{\mu_i}{t_i}$$

497

498 By normalizing  $\mu_i$  by  $t_i$ , we are modeling a rate instead of a discrete count using the negative  
499 binomial distribution. The regression term for the expected transcription rate can be expressed in  
500 terms of a linear combination of explanatory variables,  $j$  covariates ( $\vec{x}$ ).

501

$$\ln \frac{\mu_i}{t_i} = \beta_1 x_{i1} + \beta_2 x_{i2} + \dots + \beta_j x_{ij}$$

502

503 Rearranging in terms of the expected value of  $y$ , or  $\mu$ , gives

504

$$\begin{aligned}\ln \mu_i - \ln t_i &= \beta_1 x_{i1} + \beta_2 x_{i2} + \dots + \beta_j x_{ij} \\ \ln \mu_i &= \ln t_i + \beta_1 x_{i1} + \beta_2 x_{i2} + \dots + \beta_j x_{ij} \\ \mu_i &= \exp(\ln t_i + \beta_1 x_{i1} + \beta_2 x_{i2} + \dots + \beta_j x_{ij})\end{aligned}$$



505

506 The natural log of  $t_i$  on the RHS ensures  $\mu_i$  is normalized in the model, acting as an offset  
507 variable. In STARRPeaker software, we allow users to optionally choose this alternative rate  
508 model (implemented as “mode 2”) instead of the default covariate model described in the main  
509 text.

510

511 *BasicSTARRseq*

512 We used BasicSTARRseq R package version 1.10.0 downloaded from Bioconductor  
513 (<https://bioconductor.org/packages/release/bioc/html/BasicSTARRseq.html>). We used default  
514 setting as described in the software manual (minQuantile = 0.9, peakWidth = 500, maxPval =  
515 0.001, deduplicate = TRUE, model = 1) to call peaks.

516

517 *MACS2*

518 We used MACS2 version 2.1.1<sup>23</sup> at the recommended default setting, except for allowing  
519 duplicates in read (--keep-dup all), since our STARR-seq dataset was multiplexed. We called  
520 peaks with an FDR cutoff of 0.01, as recommended by the author of the software.

521

## 522 **Supplementary Tables**

523 Table S1 contains significant peaks called by STARRPeaker.

524 Table S2 contains various statistics from comparing STARRPeaker peaks to peaks called by  
525 BasicSTARRseq and MACS2.

526 Table S3 contains list of data sources and accession number used for the analysis.

527

528 **Figures**

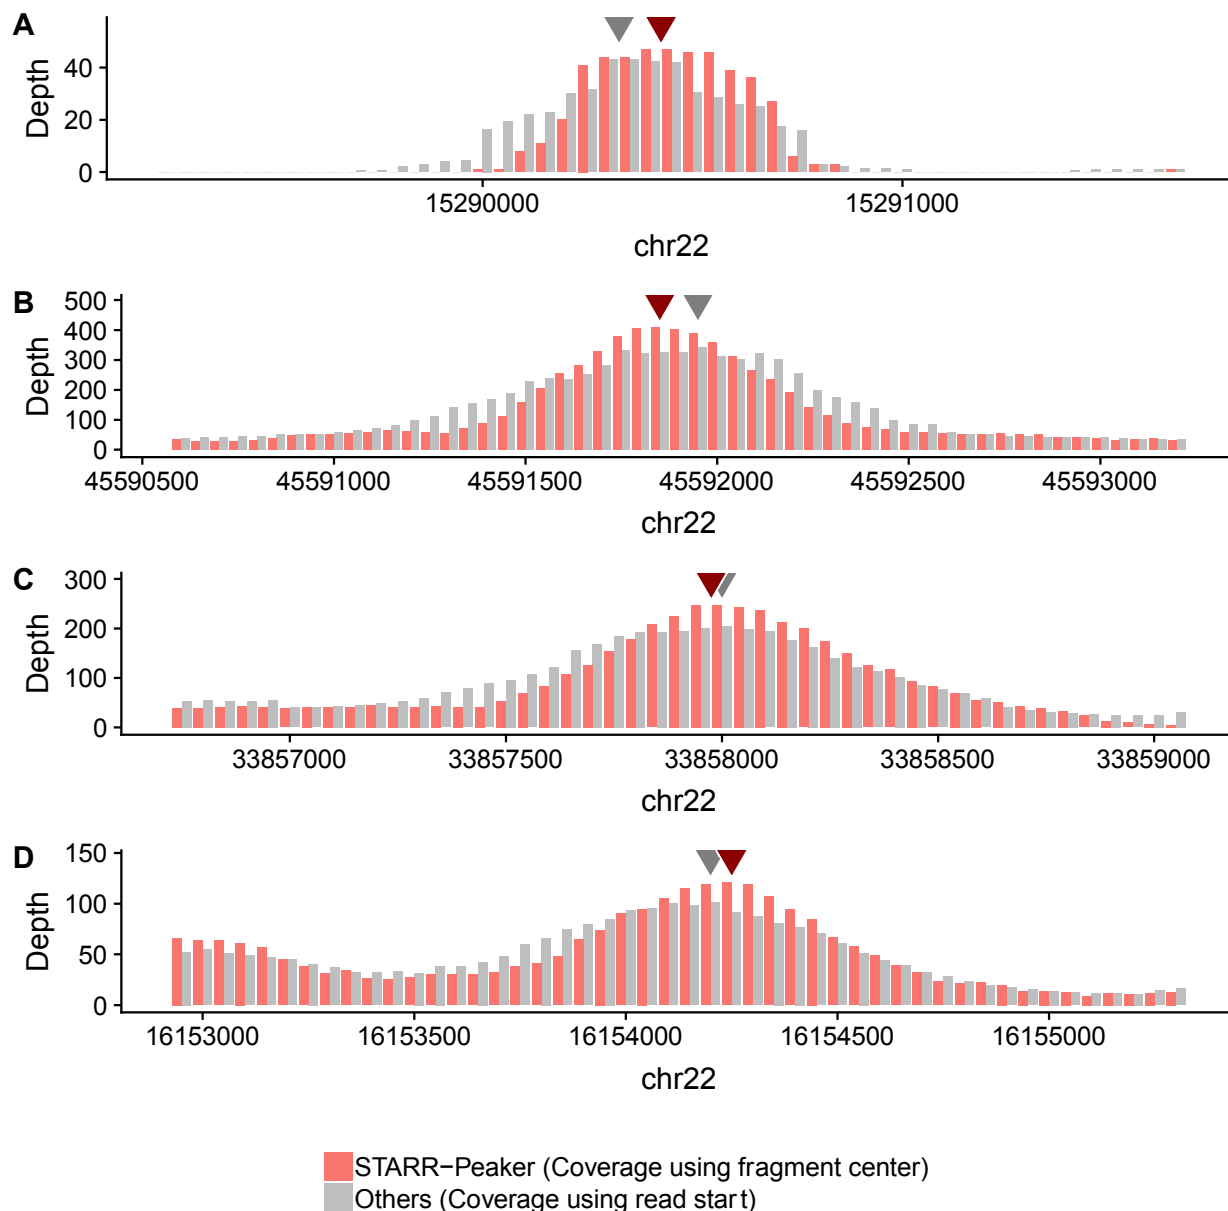

529

530 **Figure 1** Comparison of STARR-seq coverage calculated using fragment center to  
531 using read start position. (A)-(D) shows examples drawn from K562 STARR-seq data.  
532 Triangle indicates the summit of coverage. Read depth was normalized, since 2 paired  
533 reads correspond to 1 fragment.

534

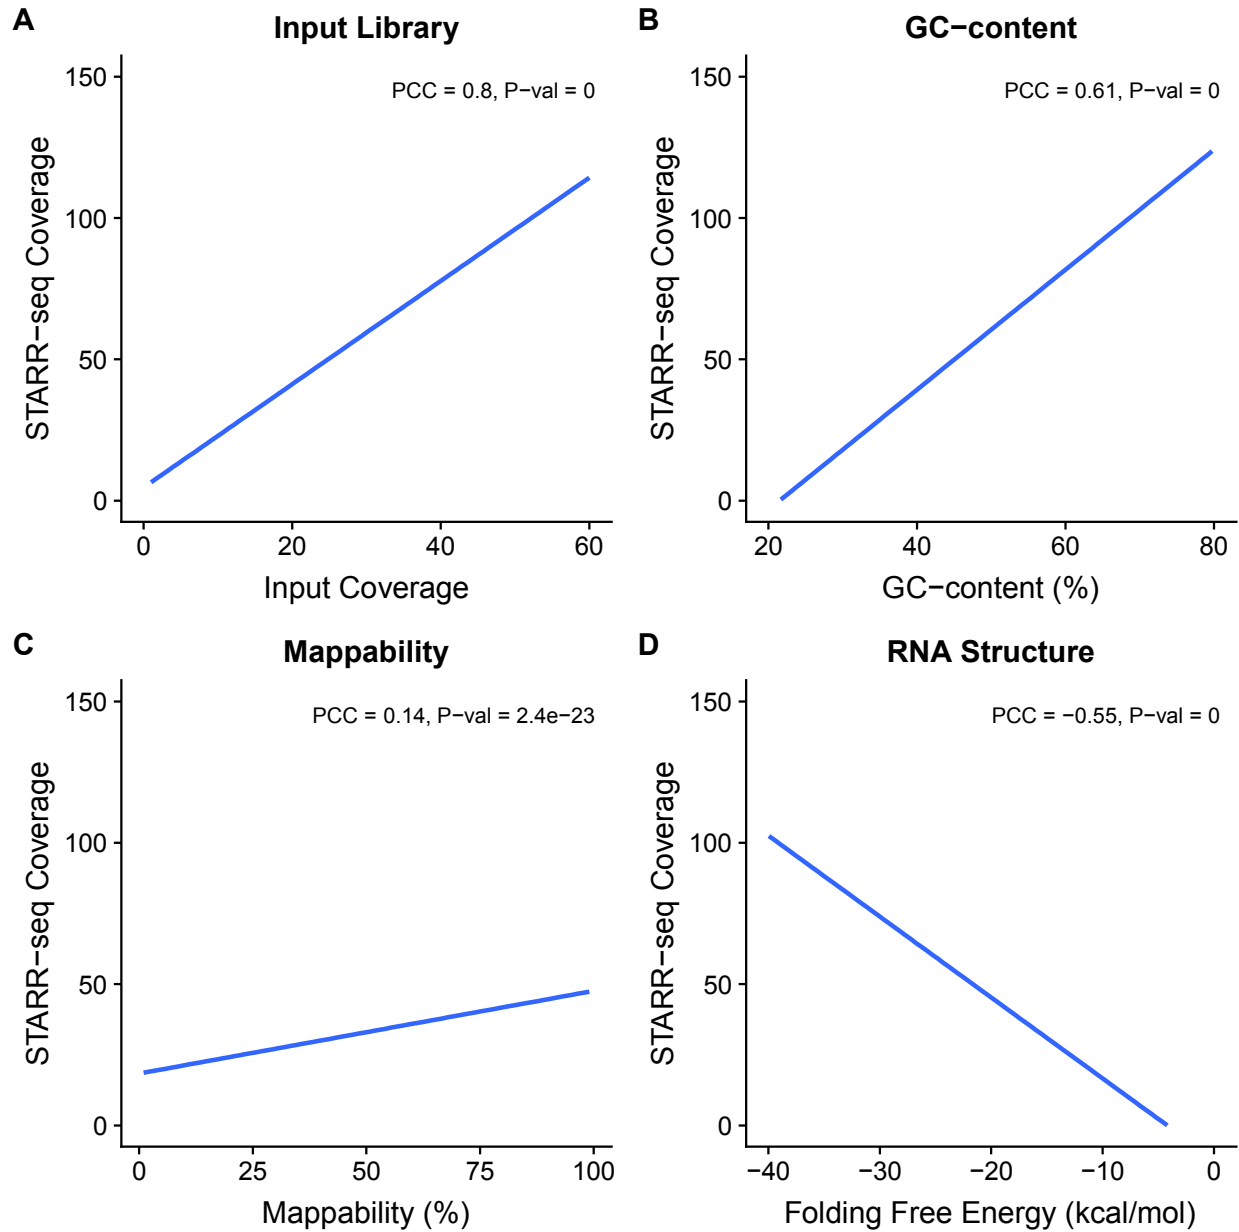

535

536 **Figure 2** Confounding factors in the STARR-seq assay. STARR-seq output and input  
537 coverages are significantly correlated with (A) input coverage (B) GC-content (C)  
538 mappability, and (D) RNA structure folding. PCC: Pearson Correlation Coefficient. Plots  
539 were from a sampling of 5,000 random genomic bins.

540

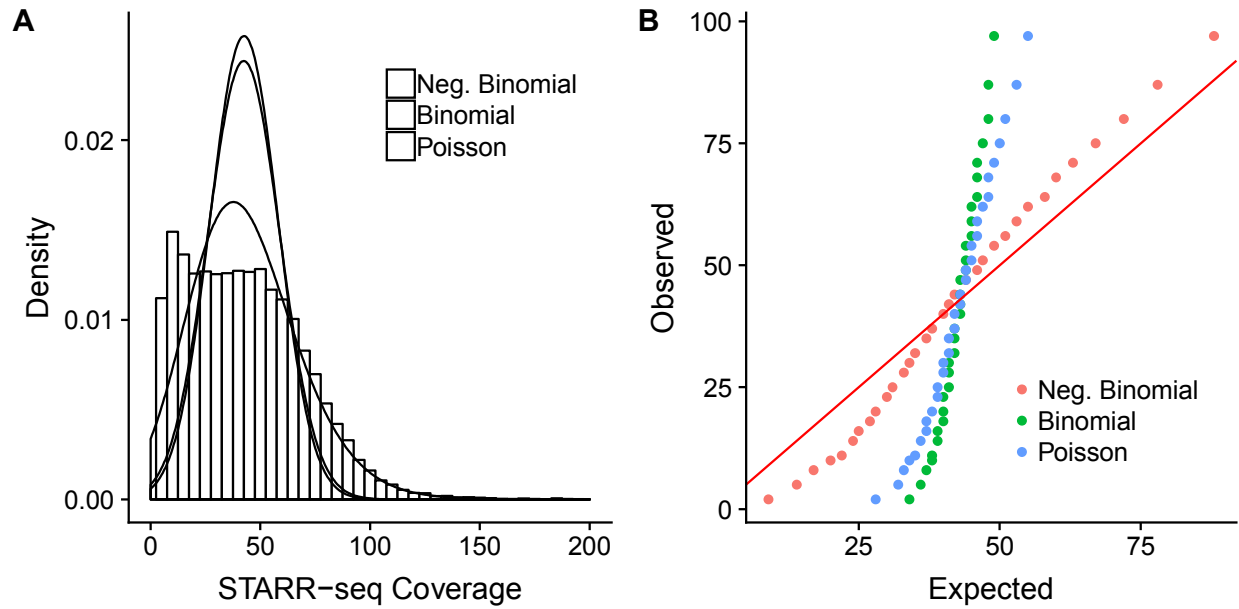

541

542 **Figure 3** STARR-seq coverage is fitted against simulated coverage using three  
543 distribution models; negative binomial, binomial, and Poisson. (A) Density histogram of  
544 simulated distribution against STARR-seq coverage. (B) Q-Q plot of simulated  
545 distribution against STARR-seq coverage. The red solid line represents where the  
546 observed count equals the expected count.

547

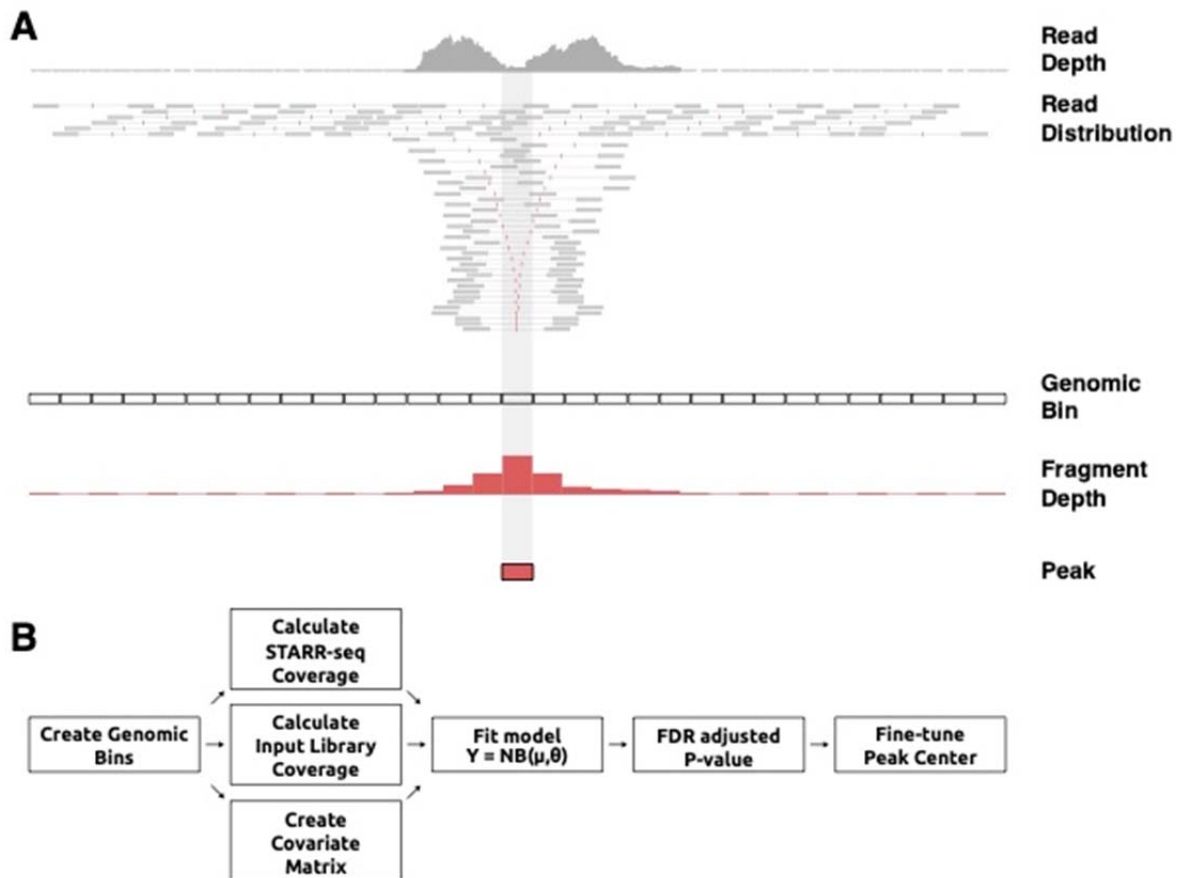

548

549 **Figure 4** Overview of STARRPeaker peak-calling scheme. (A) In contrast to using read depth  
550 (grey), fragment depth (red) offers more precise and sharper STARR-seq coverage. Fragment  
551 inserts are directly inferred from properly paired-reads. (B) Workflow of STARRPeaker  
552 describing how coverage is calculated for each genomic bin and modelled using negative  
553 binomial regression model. The analysis pipeline can largely be divided into four steps: (1)  
554 Binning the genome (2) Calculating coverage and computing covariate matrix (3) Fitting the  
555 STARR-seq data to the NB regression model (4) Peak calling, multiple hypothesis testing  
556 correction, and adjustment of the center of peaks

557

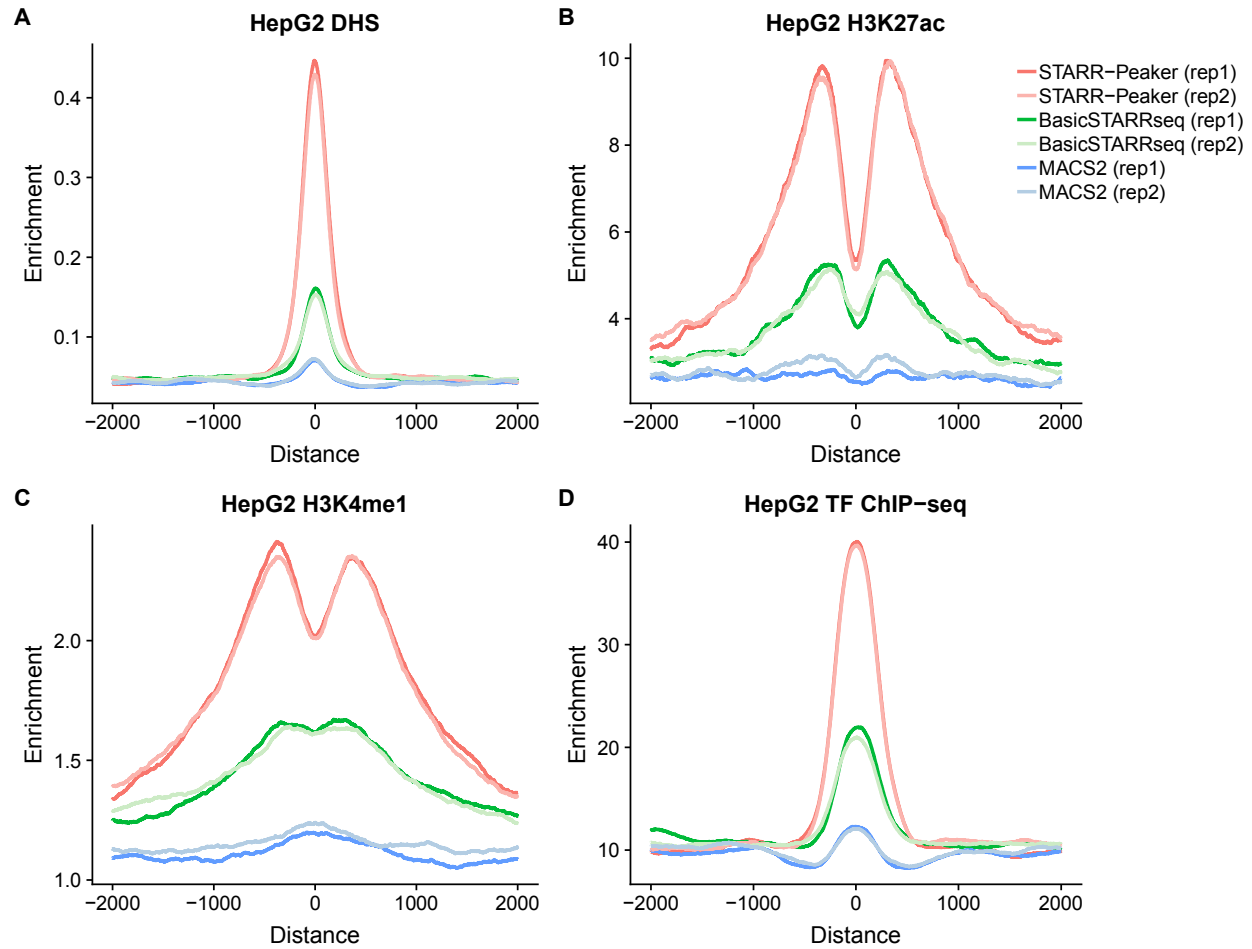

558

559 *Figure 5* Enrichment of epigenetic signals around peaks. All peaks were centered at the summit,  
560 uniformly thresholded using  $P$ -value  $< 0.001$ , and 10,000 peaks were randomly selected.  
561 Aggregated read depth at 2000 bp upstream and downstream were plotted for (A) DNase-seq (B)  
562 H3K27ac (C) H3K4me1 (D) Aggregated TF ChIP-seq profile. For TF ChIP-seq, high  
563 enrichment indicates TF binding hotspots

564

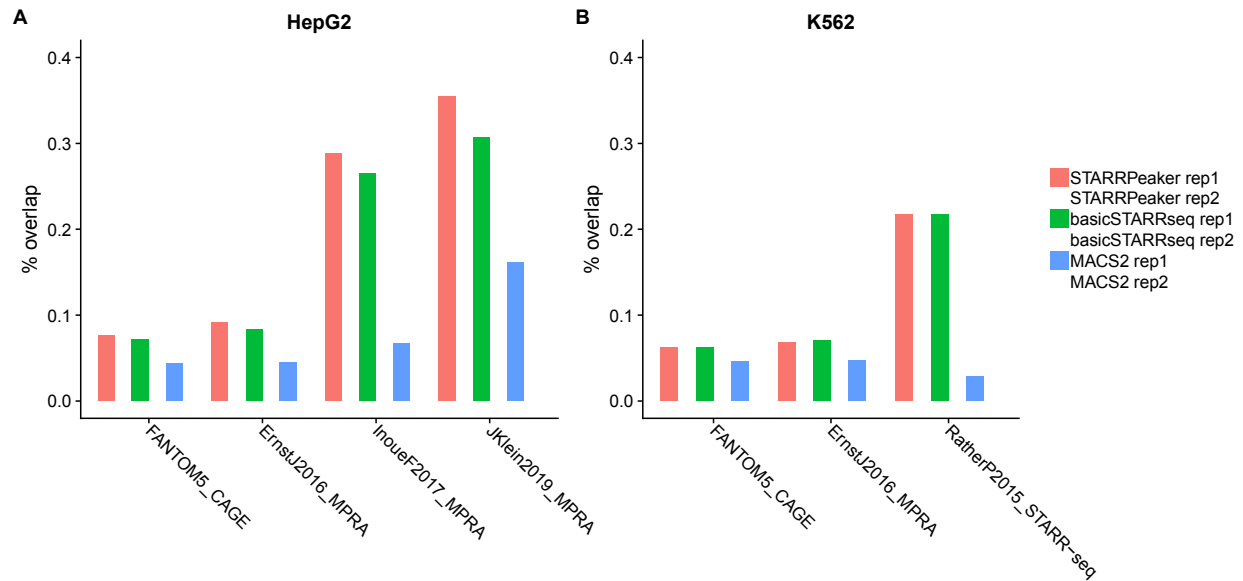

565

566 **Figure 6** Comparison of peaks using external dataset. Peaks identified from STARRPeaker as  
567 well as BasicSTARRseq and MACS2 were compared against published dataset. For a fair  
568 comparison, 100,000 peaks were randomly drawn from peaks identified by each peak caller  
569 using the recommended settings, and the fraction of overlap was computed for each replicate.  
570 We considered it as an overlap when at least 50% of peaks intersected each other.
